1 **Chromosome size affects sequence divergence between species through the interplay of**  
2 **recombination and selection**

3 Anna Tigano<sup>1,2\*</sup>, Ruqayya Khan<sup>3</sup>, Arina D. Omer<sup>3</sup>, David Weisz<sup>3</sup>, Olga Dudchenko<sup>3,4</sup>, Asha S. Multani<sup>5</sup>,  
4 Sen Pathak<sup>5</sup>, Richard R. Behringer<sup>5</sup>, Erez L. Aiden<sup>3,4,6,7,8</sup>, Heidi Fisher<sup>9</sup>, Matthew D. MacManes<sup>1,2</sup>

5

6 <sup>1</sup>University of New Hampshire, Molecular, Cellular, and Biomedical Sciences Department,  
7 Durham, NH 03824, USA

8 <sup>2</sup>Hubbard Center for Genome Studies, University of New Hampshire, Durham, NH 03824, USA

9 <sup>3</sup>The Center for Genome Architecture, Department of Molecular and Human Genetics,  
10 Baylor College of Medicine, Houston, TX 77030, USA

11 <sup>4</sup>Department of Computer Science, Department of Computational and Applied Mathematics,  
12 Rice University, Houston, TX 77030, USA

13 <sup>5</sup>Department of Genetics, University of Texas, M.D. Anderson Cancer Center, Houston, TX 77030, USA

14 <sup>6</sup>Center for Theoretical and Biological Physics, Rice University, Houston, TX 77030, USA

15 <sup>7</sup>Shanghai Institute for Advanced Immunochemical Studies, ShanghaiTech University, Shanghai  
16 201210, China

17 <sup>8</sup>School of Agriculture and Environment, University of Western Australia, Perth, WA 6009,  
18 Australia

19 <sup>9</sup>Department of Biology, University of Maryland, College Park, MD 20742, USA

20 \*corresponding author: [anna.tigano@unh.edu](mailto:anna.tigano@unh.edu)

21

22 Keywords: mammal, genome assembly, *Peromyscus*, *Mus*, great apes, genome evolution

23

24

25 **Abstract**

26 The structure of the genome, including the architecture, number, and size of its chromosomes, shapes the  
27 distribution of genetic diversity and sequence divergence. Importantly, smaller chromosomes experience  
28 higher recombination rates than larger ones. To investigate how the relationship between chromosome  
29 size and recombination rate affects sequence divergence between species, we adopted an integrative  
30 approach that combines empirical analyses and evolutionary simulations. We estimated pairwise sequence  
31 divergence among 15 species from three different Mammalian clades - *Peromyscus* rodents, *Mus* mice,  
32 and great apes - from chromosome-level genome assemblies. We found a strong significant negative  
33 correlation between chromosome size and sequence divergence in all species comparisons within the  
34 *Peromyscus* and great apes clades, but not the *Mus* clade, demonstrating that the dramatic chromosomal  
35 rearrangements among *Mus* species masked the ancestral genomic landscape of divergence in many  
36 comparisons. Moreover, our evolutionary simulations showed that the main factor determining  
37 differences in divergence among chromosomes of different size is the interplay of recombination rate and  
38 selection, with greater variation in larger populations than in smaller ones. In ancestral populations,  
39 shorter chromosomes harbor greater nucleotide diversity. As ancestral populations diverge and eventually  
40 speciate, diversity present at the onset of the split contributes to greater sequence divergence in shorter  
41 chromosomes among daughter species. The combination of empirical data and evolutionary simulations  
42 also revealed other factors that affect the relationship between chromosome size and divergence,  
43 including chromosomal rearrangements, demography, and divergence times, and deepen our  
44 understanding of the role of genome structure on the evolution of species divergence.

## 45 **Introduction**

46 Chromosomes are the fundamental unit of inheritance of the nuclear DNA in all eukaryotic species and  
47 their evolution goes arm in arm with organismal evolution. Not only the sequence, but also the size,  
48 shape, structure and number of chromosomes can vary between species, populations, and even individuals  
49 within a population (Hauffe and Searle 1993; Graphodatsky et al. 2011; Dion-Côté et al. 2017; Moura et  
50 al. 2020). Chromosome evolution is therefore crucial to our understanding of the evolution and  
51 maintenance of biodiversity. The rapidly increasing number of chromosome-level genome assemblies has  
52 started to shed light on the role of chromosomes in the genomic distribution of genetic diversity within  
53 and between species. For example, chromosome structure, including the location of telomeres or  
54 centromeres, can be a strong predictor of the position of dips and peaks in nucleotide diversity ( $\pi$ ) and  
55 sequence divergence ( $d$ ) within a chromosome (Butlin 2005; Smukowski and Noor 2011; Burri et al.  
56 2015; Sardell et al. 2018; Tigano, Jacobs, et al. 2020). The heterogeneous distribution of  $\pi$  and  $d$  in the  
57 genome is apparent among chromosomes too (Dutoit et al. 2017; Henderson and Brelsford 2020), but the  
58 role of genome structure in generating this distribution, including the number and size of chromosomes in  
59 a genome, is less clear.

60 To avoid the production of aberrant gametes, the correct segregation of chromosomes during  
61 meiosis requires that chromosomes undergo at least one cross-over per event (Mather 1938; Hassold and  
62 Hunt 2001), which results in shorter chromosomes experiencing overall proportionally higher  
63 recombination rates. In fact, a significant relationship between chromosome size and recombination rate  
64 has been reported in many species (but not all) from fungi to mammals (Kaback et al. 1992; Jensen-  
65 Seaman et al. 2004; Pessia et al. 2012; Farré et al. 2013; Kawakami et al. 2014; Haenel et al. 2018).  
66 Chromosome size is also inversely correlated with  $\pi$  in some species of birds and mammals (Dutoit et al.  
67 2017; Murray et al. 2017; Tigano, Colella, et al. 2020), but not others (Pessia et al. 2012; Dutoit et al.  
68 2017). Further, higher  $d$  in microchromosomes (< 20 Mb) relative to macrochromosomes (> 40 Mb) has  
69 been observed in several bird species (Delmore et al. 2018). These studies show the intricate relationship  
70 between chromosome size, recombination rate, nucleotide diversity, and sequence divergence: although

71 recombination rate tends to explain differences in diversity and divergence among chromosomes of  
72 different length, other factors may contribute to this relationship.

73         Investigating the factors shaping the levels and patterns of sequence divergence between species  
74 is fundamental to understand the molecular mechanisms underlying the process of adaptation and  
75 speciation. Nonetheless, the relative contribution of recombination to divergence among species has  
76 rarely been directly investigated, especially at the chromosome scale, in species other than humans  
77 (Phung et al. 2016). A recent study used chromosome size as a proxy for recombination rate to test how  
78 genome structure affected divergence among eight avian sister species pairs, and reported significantly  
79 higher divergence in microchromosomes than in macrochromosomes (Delmore et al. 2018), but it did not  
80 address the mechanisms underpinning this relationship. It is unlikely that linked selection influences the  
81 accumulation of divergence at neutral sites. Under selective sweeps or background selection, the  
82 probability that a particular neutral variant goes to fixation is simply its allele frequency, which is the  
83 same as in a neutral model (Birky and Walsh 1988). However, selection in ancestral populations will have  
84 led to variation in genetic diversity across the genome. As populations diverge, the initial differences  
85 between daughter populations simply reflect patterns of diversity present in the parent population.  
86 Heterogeneous levels of diversity across the genome of ancestral populations may give rise to variation in  
87 divergence between daughter populations. It is therefore crucial to understand what shapes the  
88 distribution of diversity across the genome.

89         Although the direct correlation between recombination rate and  $\pi$  is well understood (Begun and  
90 Aquadro 1992; Nachman 2001; Cutter and Choi 2010), the factors and their relative roles in determining  
91 this relationship are less clear (Ellegren and Galtier 2016). Non-crossover gene conversion (gene  
92 conversion hereafter) and selection, including linked selection, are among the factors most commonly  
93 invoked to explain the correlation between recombination and  $\pi$ . Gene conversion is the process by which  
94 double-strand DNA breaks during meiosis are repaired using homologous sequence as template without  
95 crossing-over, and although it affects shorter sequences than crossing-over events do, it can increase  
96 diversity and affect divergence among populations and species (Korunes and Noor 2017). Under a purely

97 neutral model of evolution,  $\pi$  is determined by the effective population size ( $N_e$ ) and the mutation rate ( $\mu$ ),  
98 as expressed by the equation  $\pi=4N_e\mu$  (Tajima 1983). In this model, higher recombination rate may  
99 increase  $\pi$  in smaller chromosomes if recombination was mutagenic through gene conversion (Coop and  
100 Przeworski 2007; Arbeithuber et al. 2015). For example, a study on humans showed a correlation between  
101 recombination, diversity, and divergence to the chimpanzee and the baboon, and explained these  
102 relationships with a pure neutral model entailing recombination-associated variation in mutation rates  
103 (Hellmann et al. 2003). In contrast, under a non-neutral evolutionary model, selection reduces diversity in  
104 the genomic regions surrounding beneficial or deleterious mutations via selective sweeps and background  
105 selection, respectively, with a greater diversity-reducing effect in areas of low recombination (Smith and  
106 Haigh 1974; Wiehe and Stephan 1993; Hudson and Kaplan 1995) - even though purifying selection can  
107 also counteract the loss of diversity due to background selection by associative overdominance if the  
108 deleterious variant is recessive (Ohta 1971; Gilbert et al. 2020). Support for the role of selection comes  
109 from another study on humans, showing how background selection in the ancestral population affects  
110 neutral divergence by reducing diversity in the sites close to selected sites (Phung et al. 2016). At the  
111 chromosome level, both gene conversion and linked selection may therefore contribute to the higher  
112 diversity reported in smaller chromosomes.

113         The analysis of chromosome-level patterns of diversity and divergence are now possible thanks to  
114 the increasing number of high-quality, chromosome-level assemblies available for several closely-related  
115 species within a clade. Great apes and *Mus* mice were the first mammalian clades with enough genomes  
116 to enable comparative genomics analyses (Thybert et al. 2018) and a wealth of information is available on  
117 the genomes of these species. For example, while within humans and among great apes, fine-scale  
118 diversity and divergence seem correlated with recombination, and recombination with chromosome size,  
119 (Hellmann et al. 2003; Jensen-Seaman et al. 2004), these relationships are weaker or not present in the  
120 house mouse *Mus musculus* (Jensen-Seaman et al. 2004; Kartje et al. 2020). Rodents of the genus  
121 *Peromyscus* represent an ideal third clade to understand how common the relationships between  
122 chromosome size, recombination, diversity, and divergence are in mammals. For example, even if

123 *Peromyscus* are rodents like *Mus*, the cactus mouse (*Peromyscus eremicus*) shows a strong inverse  
124 correlation between chromosome size and  $\pi$  (Tigano, Colella, et al. 2020) like in humans (Hellmann et al.  
125 2003), and conserved synteny, recombination rates, and crossover patterning among *Peromyscus* species  
126 (Peterson et al. 2019; Smalec et al. 2019) suggest that this relationship between chromosome size and  $\pi$   
127 may be common among species in this genus. In light of these observations on the correlation (or lack  
128 thereof) between  $\pi$  and chromosome size, we hypothesize that also  $d$  will show a negative relationship  
129 with chromosome size in great apes and *Peromyscus* but not in *Mus*.

130 By combining the analysis of chromosome-level genome assemblies from three different  
131 mammalian clades - *Mus* spp., *Peromyscus* spp., and great apes - and individual-based evolutionary  
132 simulations, we aim to understand whether chromosomes of different sizes show different levels of  
133 sequence divergence among species within a clade and to disentangle the evolutionary, demographic, and  
134 molecular factors linking recombination, diversity within species, and divergence among species.  
135 Through evolutionary simulations, we tested the role of recombination, effective population size  $N_e$ ,  
136 severity of bottleneck associated with population splitting, gene conversion, selection, divergence time,  
137 and the interplay of these factors, and discussed the role that they may play in the generation and  
138 maintenance of genetic variation and divergence, which is foundational to our understanding of the  
139 process of speciation and adaptation in the mammals examined here and other taxa.

140

## 141 **Methods**

### 142 *Analyses of divergence*

143 We examined chromosome-level reference genomes for four *Mus* species (*M. musculus*, *M. spretus*, *M.*  
144 *caroli*, and *M. pahari*), five great apes (*Homo sapiens*, *Pan troglodytes*, *Pan paniscus*, *Gorilla gorilla*,  
145 and *Pongo abelii*), and six *Peromyscus* species (*P. maniculatus*, *P. polionotus*, *P. eremicus*, *P. crinitus*, *P.*  
146 *nasutus*, and *P. californicus*; Accession numbers in Table S1), of which all but two *Peromyscus* reference  
147 genomes were publicly available. We *de novo* assembled the reference genomes of *P. nasutus* and *P.*  
148 *californicus* using a combination of sequencing approaches and final chromosome-scaffolding with Hi-C

149 data. For *P. nasutus*, we obtained a tissue sample from a female individual collected at El Malpais  
150 National Conservation Area (New Mexico, USA) and stored at the Museum of Southwestern Biology  
151 (MSB:Mamm:299083). We extracted high molecular weight DNA with the MagAttract HMW DNA Kit  
152 (QIAGEN) and selected long fragments (> 10 kb and progressively above 25 kb) using a Short Read  
153 Eliminator Kit (Circulomics Inc.). A 10X Genomics linked-read library was generated using this high  
154 quality DNA sample at Dartmouth Hitchcock Medical Center (New Hampshire, USA) and sequenced at  
155 Novogene (California, USA) using one lane of 150 bp paired-end reads on an Illumina HiSeq X  
156 sequencing platform. We produced a first draft of the *P. nasutus* genome assembly using *Supernova 2.1.1*  
157 (Weisenfeld et al. 2017) with default settings and these linked reads as input. To order and orient  
158 scaffolds in chromosomes we generated and sequenced a proximity-ligation library (Hi-C) from the same  
159 sample used for the 10X library as part of the DNA Zoo consortium effort. The Hi-C data were mapped to  
160 the 10X assembly with Juicer (Durand et al. 2016) and scaffolds were ordered and oriented in  
161 chromosomes with the *3D-DNA* pipeline (Dudchenko et al. 2017) and Juicebox Assembly Tools  
162 (Dudchenko et al.). The Hi-C data are available on [www.dnazoo.org/assemblies/Peromyscus\\_nasutus](http://www.dnazoo.org/assemblies/Peromyscus_nasutus)  
163 visualized using Juicebox.js, a cloud-based visualization system for Hi-C data (Robinson et al. 2018). For  
164 the *P. californicus* genome, high molecular weight DNA was extracted from liver tissue from a captive  
165 female individual from a colony maintained at the University of Maryland (USA) and sequenced using  
166 10X Genomics technology at the UC Davis Genome Center (California, USA). A first draft genome for  
167 *P. californicus* was based on these 10X linked reads and assembled using *Supernova* as for *P. nasutus*.  
168 Then, Chicago and Dovetail Hi-C libraries were created by Dovetail Genomics (California, USA) and  
169 used to scaffold the draft assembly with the HiRise pipeline. The Chicago data were used first and the  
170 resulting improved assembly was used as input for a second round of scaffolding with the Hi-C data only.  
171 The alignment of several *Peromyscus* genomes revealed some assembly errors in the existing *P. eremicus*  
172 assembly. Although those did not greatly affect estimates of sequence divergence at the chromosome-  
173 level, we generated an additional Hi-C library from a primary fibroblast collection at the T.C. Hsu Cryo-  
174 Zoo at the University of Texas MD Anderson Cancer Center. Using the new data we performed misjoin

175 correction and re-scaffolding using 3D-DNA (Dudchenko et al., 2017:) and Juicebox Assembly Tools  
176 (Dudchenko et al., 2018:). The new Hi-C data for *P. eremicus* are available on  
177 [www.dnazoo.org/assemblies/Peromyscus\\_ereamicus](http://www.dnazoo.org/assemblies/Peromyscus_ereamicus) visualized using Juicebox.js, a cloud-based  
178 visualization system for Hi-C data (Robinson et al. 2018).

179 We generated pairwise alignments and estimated sequence divergence ( $d$ ) with *Mummer4*  
180 (Marçais et al. 2018) and custom scripts ([https://github.com/atigano/mammal\\_chromosome\\_size](https://github.com/atigano/mammal_chromosome_size)). First,  
181 we aligned pairs of genomes in each clade with *nucmer*, randomly choosing one as the reference and the  
182 other as the query, and the settings `--maxgap 2000` and `--mincluster 1000`. We retained a global set of  
183 alignments (`-g`) longer than 10 kb using *delta-filter* and converted the output into ‘btab’ format using  
184 *show-coords*. To identify and exclude N-to-N matches from downstream analyses we based our analyses  
185 on the estimated ‘percent similarity’ rather than ‘percent identity’. As percent similarities were calculated  
186 for alignments of different lengths, we calculated weighted mean chromosome-level  $d$  ( $= 1 - (\text{percent}$   
187  $\text{similarities})$ ) for each chromosome correcting for alignment length. For the purpose of this study, we  
188 focused on autosomes and excluded estimates for sex chromosomes, when present in the genome  
189 assembly, because sex chromosomes experience a different combination of evolutionary forces than do  
190 autosomes. We tested the ability of the  $\log_{10}$ -transformed chromosome size in bp (explanatory variable) to  
191 predict mean chromosome-level divergence (response variable) separately for each species pairwise  
192 alignment using linear models (simple linear regressions), and plotted these relationships in R version  
193 3.6.2 (R core team).

194

### 195 *Evolutionary simulations*

196 To disentangle the factors contributing to the relationship between chromosome size, recombination,  
197 diversity and divergence, we performed individual-based time-forward evolutionary simulations in  
198 SLiM3 (Haller and Messer 2019). We set up a simple Wright-Fisher model, where an ancestral  
199 population ( $\text{pop}_A$ ) splits into two populations ( $\text{pop}_1$  and  $\text{pop}_2$ ) after  $20N_e$  generations (Fig. S1A). We  
200 selected this time as a burn-in to allow for coalescence, to generate diversity and to reach stable allele



201 frequencies. To test for the effect of population size and its changes over time, we simulated ancestral  
202 populations  $pop_A$  of 10,000, 40,000 and 160,000 individuals, which grossly encompass variation in  $N_e$   
203 among great apes, *Peromyscus* and *Mus* (Lack et al. 2010; Phifer-Rixey et al. 2012; Prado-Martinez et al.  
204 2013; Harris et al. 2016; Colella et al. 2020) and modeled bottlenecks of different severity associated with  
205 the split of  $pop_A$  into two daughter populations  $pop_1$  and  $pop_2$ : individuals from  $pop_A$  were either sorted  
206 into two daughter populations of equal size ( $N_e$  in  $pop_1$  and  $pop_2$  were  $0.5N_e$  of  $pop_A$ ) or an additional  
207 bottleneck further reduced  $N_e$  in  $pop_1$  and  $pop_2$  to  $0.1N_e$  of  $pop_A$ . As our working hypothesis was that  
208 chromosome size affects diversity and divergence due to higher recombination rates  $r$  in smaller  
209 chromosomes, we simulated chromosomes of fixed length (1 Mb) with varying  $r$  to account for  
210 chromosome size variation, while keeping everything else the same. Assuming one  
211 crossover/chromosome on average, mean chromosome-wide  $r$  was  $10^{-8}$  (1/sequence length), so to  
212 encompass variation in chromosome size in the mammals examined we simulated nine different  
213 recombination rates, spanning  $0.33r$  to  $3r$ , which extends beyond the variation in recombination rates  
214 expected to occur in these species based on variation in chromosome size. Note that recombination rates  
215 are even across the chromosome and constant through time. We calculated mean gene size (including  
216 introns and exons) and mean distance between genes from the gene annotation of the *P. eremicus* genome  
217 and built the chromosome structure based on these values, resulting in each chromosome having 9 coding  
218 genes of 20.5 kb separated by 94.5 kb of intergenic sequence (Fig. S1B). We used a fixed germline  
219 mutation rate for all models as estimated in *M. musculus* ( $5.7 \times 10^{-9}$ , (Milholland et al. 2017)). We modeled  
220 gene conversion rate ( $r/3$ ) and gene conversion tract length (440 bp), when included in the model, based  
221 on estimates in *Drosophila melanogaster* (Miller et al. 2016). In neutral models all mutations were  
222 neutral, whereas in models with selection mutations in coding genes could be neutral, deleterious or  
223 advantageous at a relative frequency of 0.3/1/0.0005, with the non-neutral mutations being always  
224 codominant. The fitness effects of the non-neutral mutations were drawn from a gamma distribution with  
225 a mean selection coefficient  $s$  of  $\pm 15.625 \times 10^{-3}$  and a shape parameter alpha of 0.3 based on the parameter  
226 space explored by (Campos and Charlesworth 2019; Stankowski et al. 2019). We scaled  $N_e$ ,  $\mu$ , and  $r$  by a

227 factor of 25 to expedite simulations and ran 30 unique simulation replicates for each combination of  
228 parameters. All the different parameters used in the simulations are summarized in Table 1.

229 To investigate the factors affecting levels of diversity in chromosomes of different sizes, we  
230 sampled 30 individuals when  $\text{pop}_A$  reached  $20N_e$  generations (i.e. right before the split) for each  
231 simulation, output variant sites in a VCF file, and calculated  $\pi$  across the chromosome, in coding genes  
232 only, and in intergenic areas only, using VCFtools (Danecek et al. 2011). To obtain estimates of sequence  
233 divergence from simulations comparable to those from pairwise alignment of genome assemblies, we  
234 calculated  $d$  as the proportion of unmatched bases between two haploid genomes sampled randomly from  
235 each of the two diverging populations  $\text{pop}_1$  and  $\text{pop}_2$ . We output these estimates right after the split and  
236 every 250,000 generations afterwards, up to 10 million generations. To further disentangle the effect of  
237 direct and linked selection, we estimated  $d$  also in coding genes and intergenic areas separately between  
238 the same genomes sampled above one generation after the split, when  $d$  is highest and not affected by  
239 decay yet (see Results and discussion).

240

## 241 **Results and discussion**

242 *Empirical data show a strong, inverse relationship between chromosome size and divergence between*  
243 *species, with a few exceptions*

244 Chromosome size (log-transformed) was a strong significant predictor of mean sequence divergence  $d$  in  
245 each of the species pairwise comparisons in *Peromyscus* and great apes (all comparisons had  $p < 0.001$   
246 using linear models; Fig. 1A and 1C for example comparisons, Fig. S2 and S3 for all comparisons).

247 Chromosome size showed a negative relationship to mean  $d$  and explained 62-89% and 46-65% of the  
248 variance in mean  $d$  across chromosomes (all  $R^2$  are adjusted hereafter) in *Peromyscus* and great apes,  
249 respectively. Among *Mus* spp., we found a significant, negative relationship between chromosome size  
250 and  $d$  only between *M. pahari* and *M. spretus* ( $p < 0.001$ ; Fig. 1E), which explained 42% of the variance  
251 in  $d$  across chromosomes. We hypothesized that the discrepancy between results from *Mus* and the other  
252 two clades examined could be explained by relative poor genome structure conservation in *Mus* so we

253 investigated this further. Among the *Mus* genome alignments, the *M. pahari*/*M. spretus* comparison was  
254 the only one where *M. pahari* was used as a reference genome. *M. pahari* is the most divergent (3-6  
255 million years ago) and differs from the other *Mus* species in that it shows a karyotype with 24  
256 chromosomes, while *M. spretus*, *M. musculus* and *M. caroli* exhibit karyotype with only 20 chromosomes  
257 (Thybert et al. 2018). Further, fewer synteny breaks between *M. pahari* and the rat (*Rattus norvegicus*)  
258 relative the other *Mus* species analyzed here (19 versus 35; (Thybert et al. 2018)) demonstrate that the *M.*  
259 *pahari* karyotype is the most similar to the ancestral karyotype of the *Mus* species included here. As the  
260 reference and query genomes in each pairwise comparison were chosen randomly, we produced new  
261 alignments and calculated  $d$  for all the possible pairwise combinations within each clade to test for the  
262 effect of the reference genome to chromosome-level  $d$  estimates. While in the *Peromyscus* and great apes  
263 clades all reference-query combinations, including the reciprocal of the comparisons first analyzed (Fig.  
264 1B and 1D) showed a strong negative relationship between chromosome size and  $d$  ( $R^2= 0.59-0.91$  among  
265 *Peromyscus* and 0.46-0.65 among great apes, all  $p < 0.001$ ; Fig. S2 and S3), in the *Mus* clade this  
266 relationship emerged only when *M. pahari* was used as reference genome ( $p < 0.001$ ; Fig. 1F and S4) and  
267 explained 52 and 54% of the variance in *M. musculus* and *M. caroli*, respectively (Fig. S4). While a  
268 significant positive correlation between neutral human-primate divergence and human recombination rate  
269 has been reported at smaller scales (i.e. in 100 kb sliding windows across the genome; (Phung et al.  
270 2016)), our results show that these relationships between recombination, diversity, and divergence are  
271 strong at a large, chromosome scale within three different highly divergent clades (~30-90 MYA), hence  
272 also in *Mus*, where, at least in *M. musculus*, the relationship between  $\pi$  and recombination at smaller  
273 scales is not always significant (Kartje et al. 2020).

274 The fact that chromosome size in the most ancestral karyotype (*M. pahari*), but not the derived  
275 ones (*M. musculus*, *M. spretus*, and *M. caroli*), is a strong predictor of levels of  $d$  between species with  
276 different genome structures indicates that these patterns evolve and are maintained across long  
277 evolutionary scales. The retention of ancestral patterns suggest that recombination hotspots could be  
278 conserved in rearranged chromosomes despite the evolution of a different genome structure, or that a

279 different genomic landscape of recombination has not been sufficient to redistribute variation in sequence  
280 divergence expected based on differences in chromosome size over this time scale. Though the human  
281 genome underwent a chromosomal fusion compared to the other great apes, the correlation between  
282 chromosome size and  $d$  among great apes did not seem affected by the use of the human genome as  
283 reference (i.e. chromosome size did not explain a lower proportion of the variance in these comparisons;  
284 Fig. 1C, 1D, S3).

285         The choice of a model species is largely based on its potential to provide insights that are  
286 generalizable to other organisms, yet our results builds on previous work in *M. musculus* (Jensen-Seaman  
287 et al. 2004; Kartje et al. 2020) showing that the *Mus* clade is rather an outlier, and does not serve as a  
288 good model to analyze general patterns with regards to how genome and chromosome structure affect and  
289 shape heterogenous levels and patterns of diversity and divergence across the genome. However, our  
290 analysis of the *Mus* genomes provides substantial insight into the reasons a species may deviate from  
291 expectations, showing that the apparent lack of a relationship between chromosome size and  
292 recombination rate,  $\pi$ , and  $d$  in *M. musculus* is well explained by the rearrangements of chromosome  
293 fragments playing a major confounding factor.

294

295 *Evolutionary simulations reveal the factors driving the empirical patterns.*

296 Simulations helped generate a mechanistic understanding of most of the empirical patterns reported in this  
297 and other studies (Dutoit et al. 2017; Murray et al. 2017; Kartje et al. 2020; Tigano, Colella, et al. 2020).

298 In neutral simulations, we did not observe variation in  $\pi$  among chromosomes with different  
299 recombination rates whether the model included gene conversion or not (ANOVA,  $p > 0.05$ ). These  
300 results indicate that recombination alone does not explain variation in  $\pi$  among chromosomes and that  
301 gene conversion does not contribute substantially to increasing levels of  $\pi$ , at least at the rates that we  
302 assumed and over relatively short evolutionary times ( $20N_e$  generations). Gene conversion occurs at a  
303 fraction of the recombination rate and affects only a small segment of DNA (100-2000 bp) at a time  
304 (Korunes and Noor 2017; Korunes and Noor 2019), hence its effect on chromosome-wide levels of  $\pi$  may

305 be detectable only over long evolutionary times. Recombination could also be mutagenic *per se* by  
306 promoting *de novo* mutations at the DNA breaks caused by crossovers, but the mechanism underlying this  
307 phenomenon is not clear (Hodgkinson and Eyre-Walker 2011). We did not model crossover mutagenesis  
308 in our simulations, but a recent study in humans found the mutation rate associated with crossovers to be  
309  $\sim 4\%$ , i.e. one *de novo* mutation every  $\sim 23$  crossovers (Halldorsson et al. 2019) suggesting that crossover  
310 mutagenesis could contribute to, but not entirely account for, the variation in  $\pi$  among chromosomes of  
311 different sizes over long evolutionary times, similarly to gene conversion. In contrast, in models with  
312 selection, recombination rate was a significant ( $p < 0.001$ ) predictor of differences in  $\pi$  among  
313 chromosomes across populations of three vastly different  $N_e$  (Fig. 2A). However,  $\Delta\pi$  - the difference in  $\pi$   
314 between the chromosomes with the highest and lowest recombination rates - spanned over two orders of  
315 magnitude when comparing the smallest and the largest simulated ancestral populations ( $\Delta\pi = 3.16 \cdot 10^{-5}$ -  
316  $2.69 \cdot 10^{-3}$ ; Fig. 3). Also the proportions of variance in  $\pi$  explained by recombination rate increased with  
317  $N_e$ : they were 13, 60, and 85% in populations of 10,000, 40,000 and 160,000 individuals respectively in  
318 models without gene conversion (estimates were similar for models with gene conversion, except for the  
319 smallest  $N_e$  where  $r$  explained 27% of the variation), suggesting that while selection is the main  
320 determinant of the relationship between recombination and  $\pi$  in large populations, genetic drift prevails in  
321 small populations.

322         The comparison of  $\pi$  across models with and without selection shows that diversity is lower  
323 overall, regardless of the recombination rate, in chromosomes affected by selection (Fig. 2A). The  
324 reduction in  $\pi$  is strongest at the coding genes, which experience both positive and negative selection  
325 directly, and indirectly through linked selection (Fig. 2A). Chromosome-wide estimates are more similar  
326 to those based on the analysis of intergenic areas subjected to linked selection only (Fig. 2A), which is at  
327 least partly due to the relatively much larger proportion of non-coding over coding regions. Nonetheless,  
328 a positive relationship between recombination rate and  $\pi$  is evident across the different genomic areas and  
329  $N_e$  considered (Fig. 2A). The comparison of  $\pi$  estimates from across the chromosome, coding genes only,  
330 and intergenic areas only, corroborate that differences in diversity among chromosomes of different sizes

331 are due to the balance between selection and recombination, with selection reducing diversity and  
332 recombination reducing linkage disequilibrium, thus reducing the effect of linked selection. As  
333 recombination increases, it more strongly counteracts linked selection in the intergenic areas, to the point  
334 of almost restoring levels of diversity similar to those expected under a neutral model (Fig. 2A). In other  
335 words, in our simulations the interplay between recombination and selection is the main factor driving the  
336 inverse correlation between chromosome size and  $\pi$ , a pattern that is described in many species.

337         The fact that recombination was a stronger contributor to variation in  $\pi$  in larger populations than  
338 in smaller ones could be due to one or the combination of two factors: 1) as the effect of selection in the  
339 genome depends on both effective population size and the strength of selection ( $N_e s$ ), larger populations  
340 will have proportionally more selective sweeps than smaller populations - because more mutations in  
341 small populations will have scaled coefficients so small that they will actually behave as neutral - and  
342 these sweeps will be more strong and efficient at removing diversity, and 2) larger populations will have  
343 higher population recombination rates ( $\rho = 4N_e r$ ), which will break linkage disequilibrium even more  
344 efficiently in chromosomes with high recombination rates. As smaller population will have proportionally  
345 more mutations behaving as neutral ones, more mutations will be more predominantly governed by  
346 stochasticity rather than by the deterministic effect of selection in these small populations (Charlesworth  
347 2009), which is consistent with selection explaining less variation in  $\pi$  in smaller populations than in  
348 larger ones (see above).

349         In neutral models,  $d$  did not vary across chromosomes with different recombination rates  
350 (ANOVA,  $p \gg 0.05$ ; Fig. 3B), while in models with selection differences in  $d$  among chromosomes one  
351 generation after the split were significantly different from zero (ANOVA,  $p < 0.001$ ; Fig. 2B) and  
352 strongly correlated with recombination rate ( $p < 0.001$ ; Fig. 2B), i.e. chromosomes with lower  
353 recombination rates had lower  $d$  in populations, across all three simulated  $N_e$ . Sequence divergence right  
354 after the split reflected the levels of diversity within the ancestral population before the split across all  
355 models, with higher  $\Delta d$  - the difference in  $d$  between the chromosomes with the highest and lowest  
356 recombination rates - in larger populations (Fig. 2B). Similarly to the patterns observed for  $\pi$ ,  $d$  was

357 lowest in coding regions and highest in intergenic areas, with chromosome-wide estimates lower than, but  
358 similar to, the latter (Fig. 2B). Testing empirically whether species with higher ancestral  $N_e$  show higher  
359  $\Delta d$  would support the contribution of demography in the relationship between recombination and  $d$ .  
360 However, across the three clades examined here,  $N_e$  and divergence times between species seem to  
361 covary, for example with great apes having not only the smallest  $N_e$  but also the most recent species  
362 divergence, so that the actual relative contributions of  $N_e$  and divergence times cannot be disentangled  
363 presently.

364 In neutral models,  $d$  increases linearly with time ( $4N_e\mu + 2T\mu$ , where  $T$  is the number of  
365 generations) so the severity of the bottleneck at the time of the split does not have any effect on  
366 divergence between isolated populations in our neutral simulations, even at the smallest  $N_e$ . Although  
367 genetic drift was *de facto* the only evolutionary force driving changes in allele frequency in these neutral  
368 models, its effect size ( $= 1/2N_e$ ) in our simulated populations was nonetheless very small ( $6.25 \cdot 10^{-6} - 10^{-4}$ ),  
369 which indicates that new mutations are the main source of  $d$  over time in neutral models. In fact, our  $d$   
370 estimates encompass both fixed and segregating mutations in each of the two compared populations.

371 In models with selection,  $d$  increased over time, though at a slower pace than in neutral models,  
372 and faster in smaller populations relative to larger populations (Fig. 3). Further, while larger populations  
373 showed higher overall divergence than smaller ones in the early stages of divergence, the trend reversed  
374 with time: after 10 million generations  $d$  between the smallest populations ( $N_e = 5,000$  individuals each)  
375 surpassed  $d$  both between the medium-sized ( $N_e = 20,000$  individuals each) and between the largest  
376 populations ( $N_e = 80,000$  individuals each; Fig. 3). This pattern was even more pronounced when  
377 populations  $pop_1$  and  $pop_2$  were affected by a stronger bottleneck at the time of the split from  $pop_A$ :  
378 populations of all sizes accumulated  $d$  faster than in the models with a weaker bottleneck, and even faster  
379 between the smallest populations ( $N_e = 1,000$  individuals each) compared to estimates from larger  
380 populations ( $N_e = 4,000$  and  $16,000$  individuals each, respectively; Fig. S5). These results show how  
381 genetic drift is much stronger in small populations, but only in the models with selection (Fig. S5).  
382 Neutral mutations fix at a much faster rate than those under selection because the fixation probability of a

383 locus under selection depends also on the strength of selection acting on its linked sites (Hill-Robertson  
384 interference; (Hill and Robertson 1966; Felsenstein 1974)). Given the distribution of fitness effects (DFE)  
385 we simulated, the probability of a beneficial mutation to effectively act as a neutral mutation (i.e. that  $N_e s$   
386  $< 1$ ) is higher in smaller populations than in larger ones (Charlesworth 2009). Therefore, in smaller  
387 population a higher proportion of beneficial or deleterious mutations will act as neutral and their fixation  
388 probability will be higher and depend only on the combination of genetic drift and linked selection, which  
389 in turn will depend on the strength of selection acting on the linked mutation and the rate of  
390 recombination affecting linkage disequilibrium between the two mutations.

391 We found that  $\Delta d$  decreased with divergence time in all models with selection (Fig. 4), suggesting  
392 that either divergence rate is relatively accelerated in large chromosomes or slowed down in small ones.  
393 Based on what discussed above, larger chromosomes, where recombination is lower, should experience  
394 stronger Hill-Robertson interference, and hence lower fixation probabilities and slower divergence rate,  
395 which is in contrast with what observed. Alternatively, lower recombination in larger chromosomes could  
396 strengthen the effect of linked selection, resulting in local chromosome-wide reductions in  $N_e$ , and thus  
397 stronger genetic drift and faster rate of sequence divergence than smaller chromosomes with higher  
398 recombination rates. This is clearly illustrated by an empirical study on Bornean and Sumatran  
399 Orangutans (*P. pygmaeus* and *P. abelii*) showing that estimates of ancestral  $N_e$  vary among chromosomes  
400 and that chromosome size is a strong predictor of variation in both inferred ancestral  $N_e$  and  
401 recombination rate, which in turn suggests a direct relationship between these two (Mailund et al. 2011).  
402 Additionally, (Phung et al. 2016) showed that the window-based correlation between recombination and  
403 divergence rate in simulated genomes decreased with splitting time, and attributed this decrease to a  
404 concurrent decrease in levels of ancestral variation. At the chromosome level, these observations suggest  
405 that chromosomes of different sizes may lose ancestral variation at different rates and thus may account  
406 for the decay in  $\Delta d$ .

407 These different rates of divergence explain why over time  $\Delta d$  becomes negative in our  
408 simulations, i.e. the chromosome with the lowest recombination rate becomes more divergent than the



409 chromosome with the highest recombination rate, in the populations with the smaller  $N_e$  (Fig. 4). Initially,  
410 the differences in  $\Delta d$  will be determined by  $\Delta\pi$  in the ancestral population at the time of the split, but with  
411 time the different divergence rates among chromosomes caused by the interplay of recombination,  
412 selection, and thus drift, will erode  $\Delta d$ , and even reverse it (Fig. 4). Furthermore, the severity of the  
413 bottleneck at the species split affected the  $\Delta d$  decay rate, with a faster decay in less severely reduced  $N_e$ ,  
414 regardless of ancestral  $N_e$  (Fig. 4). Also gene conversion seemed to accelerate the  $\Delta d$  decay overall, but  
415 not in the largest population experiencing the weaker bottleneck (Fig. 4). That  $\Delta d$  decay was generally  
416 faster both in populations experiencing milder bottlenecks, which therefore had larger  $N_e$ , and in models  
417 with gene conversion compared to those without, suggests that higher mutation rates in these cases can  
418 accelerate  $\Delta d$  decay. Although the ultimate mechanism is not clear, faster  $\Delta d$  decay may be explained by  
419 the rate of loss of ancestral polymorphism (Phung et al. 2016), which should be higher with higher  
420 mutation rates. Importantly, the effect of gene conversion becomes more evident after 5 million  
421 generations (Fig. 4), showing that, although gene conversion is not the main determinant of differences in  
422  $\pi$  and  $d$  among chromosomes of different sizes, it can contribute to these patterns over long evolutionary  
423 times. The evolutionary simulations provide clear insights into why the variation in divergence among  
424 chromosomes of different sizes decreases with time, and suggest that it would require either small  $N_e$   
425 and/or long divergence times to observe a negative  $\Delta d$ . We did not observe any negative  $\Delta d$  in our species  
426 pairwise comparisons. In the future, the empirical test of these observations will require the inclusion of  
427 additional clades and larger number of species comparisons within clades to verify how commonly this  
428 occurs empirically and to disentangle the factors promoting, or hindering, this pattern.

429 Our simulations were based on reasonably realistic parameters, except for the absence of  
430 neutrally evolving introns in simulated genes, to reach an acceptable compromise between capturing the  
431 complexity of the evolutionary processes, and their interactions, while maintaining enough statistical  
432 power to understand the relative roles of the many factors at play. Notwithstanding that the “real” values  
433 for the factors included in our simulations are not available for most species or nonetheless difficult to  
434 estimate, excluding introns provided more target sequence for selection to act on and a good trade-off in

435 terms of computational time and resources. With the exception of a clear effect of  $N_e$  and divergence time  
436 in the magnitude of the variation in  $d$  observed among chromosomes, our evolutionary simulations well  
437 illustrate the processes driving the empirical patterns of divergence between species described in three  
438 different clades of mammals: in the absence of chromosomal rearrangements, the interplay of  
439 recombination and selection determines levels of  $\pi$  in the ancestral species; higher  $\pi$  in the ancestral  
440 species results in higher  $d$  among haplotypes sorted into the daughter species, thus explaining the  
441 differences in  $\pi$  and  $d$  among chromosomes of different sizes.

442

443 *Empirical analyses and simulations highlight the rule and the exceptions*

444 Species showing an inverse relationship between recombination rate and chromosome size are found  
445 among mammals, birds, yeast, worms, and plants (Pessia et al. 2012), which highlights that this  
446 relationship is not an idiosyncratic feature of a particular taxon but rather a common trend. Our  
447 evolutionary simulations show that varying recombination rates across chromosomes should result in  
448 differences in  $\pi$  and  $d$  among chromosomes of different sizes, but empirical support for this prediction is  
449 mixed. In *M. musculus*, for example, chromosome size is not a good predictor of variation in  $\pi$  within the  
450 species (Pessia et al. 2012) or  $d$  to other *Mus* spp. (our study). Our analyses here have shown that this lack  
451 of correlation is due to dramatic changes in the genome structure of *M. musculus* and other congeneric  
452 species relative to their common ancestor (most similar to *M. pahari*), and hence stress the importance of  
453 the choice of the reference genome in this type of analysis. Not only the genome we use as reference  
454 could mask existing relationships due to the evolution of different genome structure, as we have shown  
455 here, but also its quality is crucial to obtain high-quality genome alignments, to calculate  $d$  accurately,  
456 and to estimate chromosome sizes from sequence length in the absence of cytological data.

457 No significant relationship between chromosome size and divergence between human and  
458 chimpanzee was found in another study (Patterson et al. 2006), but these results were based on only 20  
459 Mb of aligned sequences. Moreover, different avian species have shown a positive (Dutoit et al. 2017), a  
460 negative (Manthey et al. 2015), or no relationship (Callicrate et al. 2014) between chromosome size and

461  $\pi$ . Dramatic chromosomal rearrangements can be excluded in these examples (Ellegren 2010), begging  
462 the question: what other factors could explain these deviations from our model? First, given the variation  
463 in  $d$  within chromosomes, incomplete genome sampling may confound these chromosome-level  
464 relationships. Second, Dutoit and colleagues (2017) argue that in the collared flycatcher (*Ficedula*  
465 *albicollis*) a positive relationship between chromosome size and  $\pi$ , which is opposite to expectations,  
466 could be explained by the density of targets of selection, higher in smaller chromosomes than in larger  
467 ones in this species. However, given the high degree of synteny conservation among birds (Ellegren  
468 2010), all avian species should show a similar pattern, which is not the case. For example, the comparison  
469 of genome-wide patterns in  $\pi$  in the passenger pigeon (*Ectopistes migratorius*), known as the most  
470 abundant bird in North America before it went extinct, and the band-tailed pigeon (*Patagioenas fasciata*),  
471 with a current population size three orders of magnitude smaller, not only shows higher  $\pi$  in smaller  
472 chromosomes in both species, but also the effect of  $N_e$  on  $\Delta\pi$ , as per our predictions (Murray et al. 2017).  
473 Our analyses highlight the contribution of demography (i.e.  $N_e$ , severity of bottleneck and genetic drift) in  
474 affecting, and even reversing, the relationship between recombination,  $\pi$ , and  $d$ , which could potentially  
475 explain the opposite correlation reported in the collared flycatcher. The importance of historical  
476 demography has been demonstrated also in the divergence of the sex chromosome  $Z$  in *Heliconius*  
477 butterflies using a combination of empirical data and evolutionary simulations (Van Belleghem et al.  
478 2018). Alternatively, the strength of selection, rather than the density of targets of selection, could disrupt  
479 the correlation between chromosome size and  $\pi$  in case of strong selective sweeps preferentially occurring  
480 in small chromosomes. Finally, limited variation in recombination,  $\pi$ , and  $d$  among chromosomes could  
481 be simply due to lack of variation in chromosome size. The analysis of 128 eukaryotic and prokaryotic  
482 genomes has shown that variation in chromosome size is directly proportional to genome size (Li et al.  
483 2011), suggesting that variation in recombination,  $\pi$ , and  $d$  among chromosomes should decrease with  
484 genome size.

485

486

487 *Conclusions*

488 Variation in recombination across the genome affects the evolution and maintenance of traits relevant to  
489 adaptation and speciation, the genomic architecture of the loci underlying those traits, and our ability to  
490 detect those loci (Yeaman and Otto 2011; Yeaman 2013; Cruickshank and Hahn 2014; Burri et al. 2015;  
491 Lotterhos 2019; Booker et al. 2020). We have shown strong evidence from empirical analyses and  
492 evolutionary simulations that the inverse relationship between recombination rate and chromosome size  
493 can result in significant differences in  $\pi$  and  $d$  among chromosomes of different sizes, and this  
494 relationship is known to affect estimates of ancestral  $N_e$  in chromosomes of different sizes (Mailund et al.  
495 2011). In the clades included in this study,  $N_e$  covaries with divergence time scales, thus it is not possible  
496 to disentangle the relative effect of these two factors on patterns of divergence at this time. Future  
497 analyses of species from with different combinations of  $N_e$  and divergence times will help address this  
498 gap. Nonetheless, our study shows that chromosome size should be considered in the study of the  
499 genomic basis of adaptation and speciation. Do smaller chromosomes play a proportionally more  
500 prominent role than larger chromosomes in adaptation and speciation? Or are these differences in  $\pi$  and  $d$   
501 strong enough to confound signals of selection in the genome? As chromosome-level assemblies and  
502 population whole genome resequencing data of closely-related species become available for an increasing  
503 number of taxa, the combination of empirical and theoretical investigations will help address these  
504 outstanding questions and generate new ones on chromosome and genome evolution.

505

506 **Acknowledgements**

507 We would like to thank the Museum of Southern Biology for the *P. nasutus* sample, and Tom Booker for  
508 helpful feedback on the simulations and a previous version of the manuscript. All analyses and  
509 simulations were performed on the UNH Premise Cluster. This work was funded by the National Institute  
510 of Health National Institute of General Medical Sciences to M.D.M. (1R35GM128843). All scripts for  
511 sequence divergence analyses, evolutionary simulation, and figures are stored at  
512 [https://github.com/atigano/mammal\\_chromosome\\_size](https://github.com/atigano/mammal_chromosome_size). Pawsey Supercomputing Centre with funding

513 from the Australian Government and the Government of Western Australia for computational support of  
514 the DNA Zoo assembly effort. E.L.A. was supported by an NSF Physics Frontiers Center Award  
515 (PHY1427654), the Welch Foundation (Q-1866), a USDA Agriculture and Food Research Initiative  
516 Grant (2017-05741), and an NIH Encyclopedia of DNA Elements Mapping Center Award  
517 (UM1HG009375). DNA Zoo sequencing effort is supported by Illumina, Inc. The Hi-C data generated by  
518 the DNA Zoo Consortium is available on [www.dnazoo.org](http://www.dnazoo.org) and via the DNA Zoo SRA BioProject  
519 #PRJNA512907.

520

#### 521 **Author contributions**

522 A.T. conceived the study, performed analyses and simulations, and wrote the first version of the  
523 manuscript. R.K., A.D.O. generated the Hi-C data for *P. nasutus* and *P. critinus* as part of the DNA Zoo  
524 effort, and R.K., D.W., O.D. and E.L.A. used these data to generate the corresponding chromosome-  
525 length assemblies. A.M., S.P., and R.R.B. provided species-authenticated *Peromyscus* primary  
526 fibroblasts. A.T., H.F., and M.D.M. generated data, assembled genomes, and reviewed and edited the  
527 paper. All authors approved the final version of the manuscript.

## 528 References

- 529 Arbeithuber B, Betancourt AJ, Ebner T, Tiemann-Boege I. 2015. Crossovers are associated with mutation  
530 and biased gene conversion at recombination hotspots. *Proc. Natl. Acad. Sci. U. S. A.* 112:2109–  
531 2114.
- 532 Begun DJ, Aquadro CF. 1992. Levels of naturally occurring DNA polymorphism correlate with  
533 recombination rates in *D. melanogaster*. *Nature* 356:519–520.
- 534 Birky CW Jr, Walsh JB. 1988. Effects of linkage on rates of molecular evolution. *Proc. Natl. Acad. Sci.*  
535 *U. S. A.* 85:6414–6418.
- 536 Booker TR, Yeaman S, Whitlock M. 2020. Variation in recombination rate affects detection of outliers in  
537 genome scans under neutrality. *Mol. Ecol.* 29:4274–4279.
- 538 Burri R, Nater A, Kawakami T, Mugal CF, Olason PI, Smeds L, Suh A, Dutoit L, Bureš S, Garamszegi  
539 LZ, et al. 2015. Linked selection and recombination rate variation drive the evolution of the genomic  
540 landscape of differentiation across the speciation continuum of *Ficedula* flycatchers. *Genome Res.*  
541 25:1656–1665.
- 542 Butlin RK. 2005. Recombination and speciation. *Mol. Ecol.* 14:2621–2635.
- 543 Callicrate T, Dikow R, Thomas JW, Mullikin JC, Jarvis ED, Fleischer RC, NISC Comparative  
544 Sequencing Program. 2014. Genomic resources for the endangered Hawaiian honeycreepers. *BMC*  
545 *Genomics* 15:1098.
- 546 Campos JL, Charlesworth B. 2019. The Effects on Neutral Variability of Recurrent Selective Sweeps and  
547 Background Selection. *Genetics* 212:287–303.
- 548 Charlesworth B. 2009. Effective population size and patterns of molecular evolution and variation. *Nat.*  
549 *Rev. Genet.* 10:195–205.
- 550 Colella JP, Tigano A, Dudchenko O, Omer AD, Khan R, Bochkov ID, Aiden EL, MacManes MD. 2020.  
551 Multiple evolutionary pathways to achieve thermal adaptation in small mammals. *bioRxiv*  
552 [Internet]:2020.06.29.178392. Available from:  
553 <https://www.biorxiv.org/content/10.1101/2020.06.29.178392v2.abstract>
- 554 Coop G, Przeworski M. 2007. An evolutionary view of human recombination. *Nat. Rev. Genet.* 8:23–34.
- 555 Cruickshank TE, Hahn MW. 2014. Reanalysis suggests that genomic islands of speciation are due to  
556 reduced diversity, not reduced gene flow. *Mol. Ecol.* 23:3133–3157.
- 557 Cutter AD, Choi JY. 2010. Natural selection shapes nucleotide polymorphism across the genome of the  
558 nematode *Caenorhabditis briggsae*. *Genome Res.* 20:1103–1111.
- 559 Danecek P, Auton A, Abecasis G, Albers CA, Banks E, DePristo MA, Handsaker RE, Lunter G, Marth  
560 GT, Sherry ST, et al. 2011. The variant call format and VCFtools. *Bioinformatics* 27:2156–2158.
- 561 Delmore KE, Lugo Ramos JS, Van Doren BM, Lundberg M, Bensch S, Irwin DE, Liedvogel M. 2018.  
562 Comparative analysis examining patterns of genomic differentiation across multiple episodes of  
563 population divergence in birds. *Evol. Lett.* 2:76–87.

- 564 Dion-Côté A-M, Symonová R, Lamaze FC, Pelikánová Š, Ráb P, Bernatchez L. 2017. Standing  
565 chromosomal variation in Lake Whitefish species pairs: The role of historical contingency and  
566 relevance for speciation. *Mol. Ecol.* 26:178–192.
- 567 Dudchenko O, Batra SS, Omer AD, Nyquist SK, Hoeger M, Durand NC, Shamim MS, Machol I, Lander  
568 ES, Aiden AP, et al. 2017. De novo assembly of the *Aedes aegypti* genome using Hi-C yields  
569 chromosome-length scaffolds. *Science* 356:92–95.
- 570 Dudchenko O, Shamim MS, Batra SS, Durand NC, Musial NT, Mostofa R, Pham M, St Hilaire BG, Yao  
571 W, Stamenova E, et al. 2018. The Juicebox Assembly Tools module facilitates de novo assembly of  
572 mammalian genomes with chromosome-length scaffolds for under \$1000. Available from:  
573 <http://dx.doi.org/10.1101/254797>
- 574 Durand NC, Robinson JT, Shamim MS, Machol I, Mesirov JP, Lander ES, Aiden EL. 2016. Juicebox  
575 Provides a Visualization System for Hi-C Contact Maps with Unlimited Zoom. *Cell Syst* 3:99–101.
- 576 Dutoit L, Burri R, Nater A, Mugal CF, Ellegren H. 2017. Genomic distribution and estimation of  
577 nucleotide diversity in natural populations: perspectives from the collared flycatcher (*Ficedula*  
578 *albicollis*) genome. *Mol. Ecol. Resour.* 17:586–597.
- 579 Ellegren H. 2010. Evolutionary stasis: the stable chromosomes of birds. *Trends Ecol. Evol.* 25:283–291.
- 580 Ellegren H, Galtier N. 2016. Determinants of genetic diversity. *Nat. Rev. Genet.* 17:422–433.
- 581 Farré M, Micheletti D, Ruiz-Herrera A. 2013. Recombination Rates and Genomic Shuffling in Human  
582 and Chimpanzee—A New Twist in the Chromosomal Speciation Theory. *Mol. Biol. Evol.* 30:853–  
583 864.
- 584 Felsenstein J. 1974. The evolutionary advantage of recombination. *Genetics* 78:737–756.
- 585 Gilbert KJ, Pouyet F, Excoffier L, Peischl S. 2020. Transition from Background Selection to Associative  
586 Overdominance Promotes Diversity in Regions of Low Recombination. *Curr. Biol.* 30:101–107.e3.
- 587 Graphodatsky AS, Trifonov VA, Stanyon R. 2011. The genome diversity and karyotype evolution of  
588 mammals. *Mol. Cytogenet.* 4:22.
- 589 Haenel Q, Laurentino TG, Roesti M, Berner D. 2018. Meta-analysis of chromosome-scale crossover rate  
590 variation in eukaryotes and its significance to evolutionary genomics. *Mol. Ecol.* 27:2477–2497.
- 591 Halldorsson BV, Palsson G, Stefansson OA, Jonsson H, Hardarson MT, Eggertsson HP, Gunnarsson B,  
592 Oddsson A, Halldorsson GH, Zink F, et al. 2019. Characterizing mutagenic effects of recombination  
593 through a sequence-level genetic map. *Science* [Internet] 363. Available from:  
594 <http://dx.doi.org/10.1126/science.aau1043>
- 595 Haller BC, Messer PW. 2019. SLiM 3: Forward Genetic Simulations Beyond the Wright–Fisher Model.  
596 *Mol. Biol. Evol.* 36:632–637.
- 597 Harris SE, Xue AT, Alvarado-Serrano D, Boehm JT, Joseph T, Hickerson MJ, Munshi-South J. 2016.  
598 Urbanization shapes the demographic history of a native rodent (the white-footed mouse,  
599 *Peromyscus leucopus*) in New York City. *Biology Letters* [Internet] 12:20150983. Available from:  
600 <http://dx.doi.org/10.1098/rsbl.2015.0983>
- 601 Hassold T, Hunt P. 2001. To err (meiotically) is human: the genesis of human aneuploidy. *Nat. Rev.*

- 602           *Genet.* 2:280–291.
- 603   Hauffe HC, Searle JB. 1993. Extreme karyotypic variation in a *Mus musculus domesticus* hybrid zone:  
604           the tobacco mouse story revisited. *Evolution* 47:1374–1395.
- 605   Hellmann I, Ebersberger I, Ptak SE, Pääbo S, Przeworski M. 2003. A neutral explanation for the  
606           correlation of diversity with recombination rates in humans. *Am. J. Hum. Genet.* 72:1527–1535.
- 607   Henderson EC, Brelsford A. 2020. Genomic differentiation across the speciation continuum in three  
608           hummingbird species pairs. *BMC Evol. Biol.* 20:113.
- 609   Hill WG, Robertson A. 1966. The effect of linkage on limits to artificial selection. *Genetical Research*  
610           [Internet] 8:269–294. Available from: <http://dx.doi.org/10.1017/s0016672300010156>
- 611   Hodgkinson A, Eyre-Walker A. 2011. Variation in the mutation rate across mammalian genomes. *Nat.*  
612           *Rev. Genet.* 12:756–766.
- 613   Hudson RR, Kaplan NL. 1995. Deleterious background selection with recombination. *Genetics*  
614           141:1605–1617.
- 615   Jensen-Seaman MI, Furey TS, Payseur BA, Lu Y, Roskin KM, Chen C-F, Thomas MA, Haussler D,  
616           Jacob HJ. 2004. Comparative recombination rates in the rat, mouse, and human genomes. *Genome*  
617           *Res.* 14:528–538.
- 618   Kaback DB, Guacci V, Barber D, Mahon JW. 1992. Chromosome size-dependent control of meiotic  
619           recombination. *Science* 256:228–232.
- 620   Kartje ME, Jing P, Payseur BA. 2020. Weak Correlation between Nucleotide Variation and  
621           Recombination Rate across the House Mouse Genome. *Genome Biol. Evol.* 12:293–299.
- 622   Kawakami T, Smeds L, Backström N, Husby A, Qvarnström A, Mugal CF, Olason P, Ellegren H. 2014.  
623           A high-density linkage map enables a second-generation collared flycatcher genome assembly and  
624           reveals the patterns of avian recombination rate variation and chromosomal evolution. *Molecular*  
625           *Ecology* [Internet] 23:4035–4058. Available from: <http://dx.doi.org/10.1111/mec.12810>
- 626   Korunes KL, Noor MAF. 2017. Gene conversion and linkage: effects on genome evolution and  
627           speciation. *Mol. Ecol.* 26:351–364.
- 628   Korunes KL, Noor MAF. 2019. Pervasive gene conversion in chromosomal inversion heterozygotes. *Mol.*  
629           *Ecol.* 28:1302–1315.
- 630   Lack JB, Pfau RS, Wilson GM. 2010. Demographic history and incomplete lineage sorting obscure  
631           population genetic structure of the Texas mouse (*Peromyscus attwateri*). *J. Mammal.* 91:314–325.
- 632   Li X, Zhu C, Lin Z, Wu Y, Zhang D, Bai G, Song W, Ma J, Muehlbauer GJ, Scanlon MJ, et al. 2011.  
633           Chromosome size in diploid eukaryotic species centers on the average length with a conserved  
634           boundary. *Mol. Biol. Evol.* 28:1901–1911.
- 635   Lotterhos KE. 2019. The Effect of Neutral Recombination Variation on Genome Scans for Selection. *G3*  
636           9:1851–1867.
- 637   Mailund T, Dutheil JY, Hobolth A, Lunter G, Schierup MH. 2011. Estimating divergence time and  
638           ancestral effective population size of Bornean and Sumatran orangutan subspecies using a coalescent



- 639 hidden Markov model. *PLoS Genet.* 7:e1001319.
- 640 Manthey JD, Klicka J, Spellman GM. 2015. Chromosomal patterns of diversity and differentiation in  
641 creepers: a next-gen phylogeographic investigation of *Certhia americana*. *Heredity* 115:165–172.
- 642 Marçais G, Delcher AL, Phillippy AM, Coston R, Salzberg SL, Zimin A. 2018. MUMmer4: A fast and  
643 versatile genome alignment system. *PLoS Comput. Biol.* 14:e1005944.
- 644 Mather K. 1938. Crossing-over. *Biol. Rev. Camb. Philos. Soc.* 13:252–292.
- 645 Milholland B, Dong X, Zhang L, Hao X, Suh Y, Vijg J. 2017. Differences between germline and somatic  
646 mutation rates in humans and mice. *Nat. Commun.* 8:15183.
- 647 Miller DE, Smith CB, Kazemi NY, Cockrell AJ, Arvanitakis AV, Blumenstiel JP, Jaspersen SL, Hawley  
648 RS. 2016. Whole-Genome Analysis of Individual Meiotic Events in *Drosophila melanogaster*  
649 Reveals That Noncrossover Gene Conversions Are Insensitive to Interference and the Centromere  
650 Effect. *Genetics* 203:159–171.
- 651 Moura MN, Cardoso DC, Lima Baldez BC. 2020. Intraspecific variation in the karyotype length and  
652 genome size of fungus-farming ants (genus *Mycetophylax*), with remarks on procedures for the  
653 estimation of genome size in the Formicidae by flow cytometry. *PLoS One* [Internet]. Available  
654 from: <https://journals.plos.org/plosone/article?id=10.1371/journal.pone.0237157>
- 655 Murray GGR, Soares AER, Novak BJ, Schaefer NK, Cahill JA, Baker AJ, Demboski JR, Doll A, Da  
656 Fonseca RR, Fulton TL, et al. 2017. Natural selection shaped the rise and fall of passenger pigeon  
657 genomic diversity. *Science* 358:951–954.
- 658 Nachman MW. 2001. Single nucleotide polymorphisms and recombination rate in humans. *Trends Genet.*  
659 17:481–485.
- 660 Ohta T. 1971. Associative overdominance caused by linked detrimental mutations. *Genet. Res.* 18:277–  
661 286.
- 662 Patterson N, Richter DJ, Gnerre S, Lander ES, Reich D. 2006. Genetic evidence for complex speciation of  
663 humans and chimpanzees. *Nature* 441:1103–1108.
- 664 Pessia E, Popa A, Mousset S, Rezvoy C, Duret L, Marais GAB. 2012. Evidence for widespread GC-  
665 biased gene conversion in eukaryotes. *Genome Biol. Evol.* 4:675–682.
- 666 Peterson AL, Miller ND, Payseur BA. 2019. Conservation of the genome-wide recombination rate in  
667 white-footed mice. *Heredity* 123:442–457.
- 668 Phifer-Rixey M, Bonhomme F, Boursot P, Churchill GA, Piálek J, Tucker PK, Nachman MW. 2012.  
669 Adaptive evolution and effective population size in wild house mice. *Mol. Biol. Evol.* 29:2949–2955.
- 670 Phung TN, Huber CD, Lohmueller KE. 2016. Determining the Effect of Natural Selection on Linked  
671 Neutral Divergence across Species. *PLoS Genet.* 12:e1006199.
- 672 Prado-Martinez J, Sudmant PH, Kidd JM, Li H, Kelley JL, Lorente-Galdos B, Veeramah KR, Woerner  
673 AE, O’Connor TD, Santpere G, et al. 2013. Great ape genetic diversity and population history.  
674 *Nature* 499:471–475.
- 675 Robinson JT, Turner D, Durand NC, Thorvaldsdóttir H, Mesirov JP, Aiden EL. 2018. Juicebox.js

- 676 Provides a Cloud-Based Visualization System for Hi-C Data. *Cell Syst* 6:256–258.e1.
- 677 Sardell JM, Cheng C, Dagilis AJ, Ishikawa A, Kitano J, Peichel CL, Kirkpatrick M. 2018. Sex  
678 Differences in Recombination in Sticklebacks. *G3* 8:1971–1983.
- 679 Smalec BM, Heider TN, Flynn BL, O’Neill RJ. 2019. A centromere satellite concomitant with extensive  
680 karyotypic diversity across the *Peromyscus* genus defies predictions of molecular drive.  
681 *Chromosome Res.* [Internet]. Available from: <http://dx.doi.org/10.1007/s10577-019-09605-1>
- 682 Smith JM, Haigh J. 1974. The hitch-hiking effect of a favourable gene. *Genet. Res.* 23:23–35.
- 683 Smukowski CS, Noor MAF. 2011. Recombination rate variation in closely related species. *Heredity*  
684 107:496–508.
- 685 Stankowski S, Chase MA, Fuiten AM, Rodrigues MF, Ralph PL, Streisfeld MA. 2019. Widespread  
686 selection and gene flow shape the genomic landscape during a radiation of monkeyflowers. *PLoS*  
687 *Biol.* 17:e3000391.
- 688 Tajima F. 1983. Evolutionary relationship of DNA sequences in finite populations. *Genetics* 105:437–  
689 460.
- 690 Thybert D, Roller M, Navarro FCP, Fiddes I, Streeter I, Feig C, Martin-Galvez D, Kolmogorov M,  
691 Janoušek V, Akanni W, et al. 2018. Repeat associated mechanisms of genome evolution and  
692 function revealed by the *Mus caroli* and *Mus pahari* genomes. *Genome Res.* 28:448–459.
- 693 Tigano A, Colella JP, MacManes MD. 2020. Comparative and population genomics approaches reveal  
694 the basis of adaptation to deserts in a small rodent. *Mol. Ecol.* [Internet]. Available from:  
695 <http://dx.doi.org/10.1111/mec.15401>
- 696 Tigano A, Jacobs A, Wilder AP, Nand A, Zhan Y, Dekker J, Therkildsen NO. 2020. Chromosome-level  
697 assembly of the Atlantic silverside genome reveals extreme levels of sequence diversity and  
698 structural genetic variation. *Cold Spring Harbor Laboratory* [Internet]:2020.10.27.357293.  
699 Available from: <https://www.biorxiv.org/content/10.1101/2020.10.27.357293v1.abstract>
- 700 Van Belleghem SM, Baquero M, Papa R, Salazar C, McMillan WO, Counterman BA, Jiggins CD, Martin  
701 SH. 2018. Patterns of Z chromosome divergence among *Heliconius* species highlight the importance  
702 of historical demography. *Mol. Ecol.* 27:3852–3872.
- 703 Weisenfeld NI, Kumar V, Shah P, Church DM, Jaffe DB. 2017. Direct determination of diploid genome  
704 sequences. *Genome Res.* 27:757–767.
- 705 Wiehe TH, Stephan W. 1993. Analysis of a genetic hitchhiking model, and its application to DNA  
706 polymorphism data from *Drosophila melanogaster*. *Mol. Biol. Evol.* 10:842–854.
- 707 Yeaman S. 2013. Genomic rearrangements and the evolution of clusters of locally adaptive loci. *Proc.*  
708 *Natl. Acad. Sci. U. S. A.* 110:E1743–E1751.
- 709 Yeaman S, Otto SP. 2011. Establishment and maintenance of adaptive genetic divergence under  
710 migration, selection, and drift. *Evolution* 65:2123–2129.

711

712 **Figures and Tables**

713

714 **Fig.1.** Plots showing the relationship between  $\log_{10}$ -transformed chromosome size (bp) and sequence  
715 divergence among species within the *Peromyscus*, Hominidae and *Mus* clades. On the left panel (A, C,  
716 E), one representative comparison from each of the *Peromyscus*, Hominidae, and *Mus* clades are  
717 displayed (see Figure S2, S3, and S4 for all comparisons). The comparison of the same species pairs are  
718 represented on the right panel but the query and reference species are inverted in plots B, D, F to highlight  
719 that in the *Mus*, but not in *Peromyscus* and *Hominidae* clades, the choice of the reference genome affects  
720 the correlation between chromosome size and  $d$ . In the bottom panel, the comparison between *Mus*  
721 *spretus* and *M. pahari* is shown, with *M. pahari* as reference on the left (E) and with *M. spretus* as  
722 reference on the right (F).

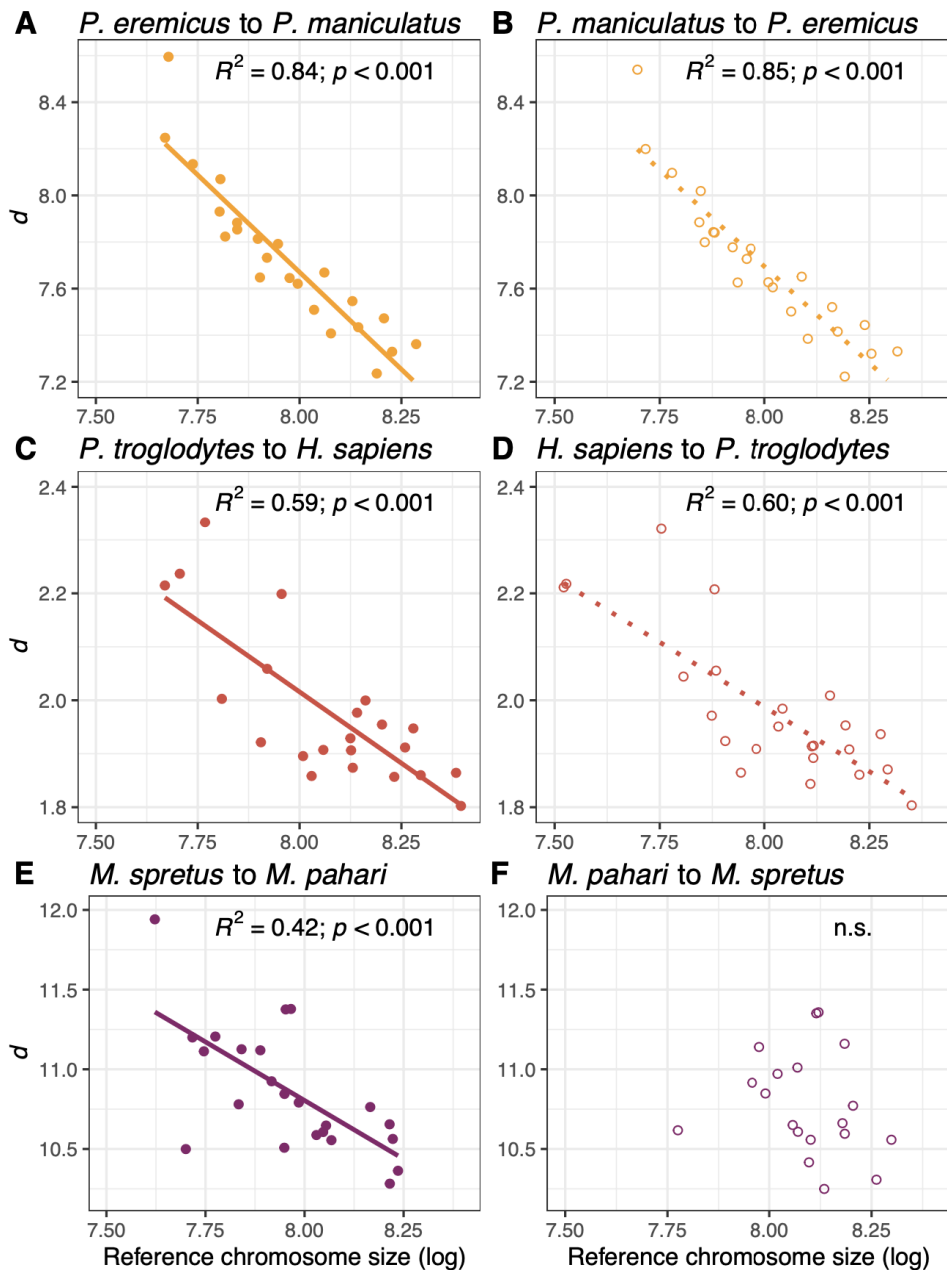

723

724

725 **Fig. 2.** Boxplots summarizing results from evolutionary simulations on the relationship between  
726 recombination rate and  $\pi$  after  $20N_e$  generations in the ancestral population (panel A on the left) and  $d$   
727 one generation after the split after a mild bottleneck ( $0.5$  of ancestral  $N_e$ ) between the two daughter  
728 populations (panel B on the right) in each of three simulated ancestral  $N_e$ . Boxplots refer to the results  
729 from the models with selection and the dashed line shows the results from the neutral models. Here are  
730 the results with models without gene conversion as no significant differences were found between models  
731 with and without gene conversion.

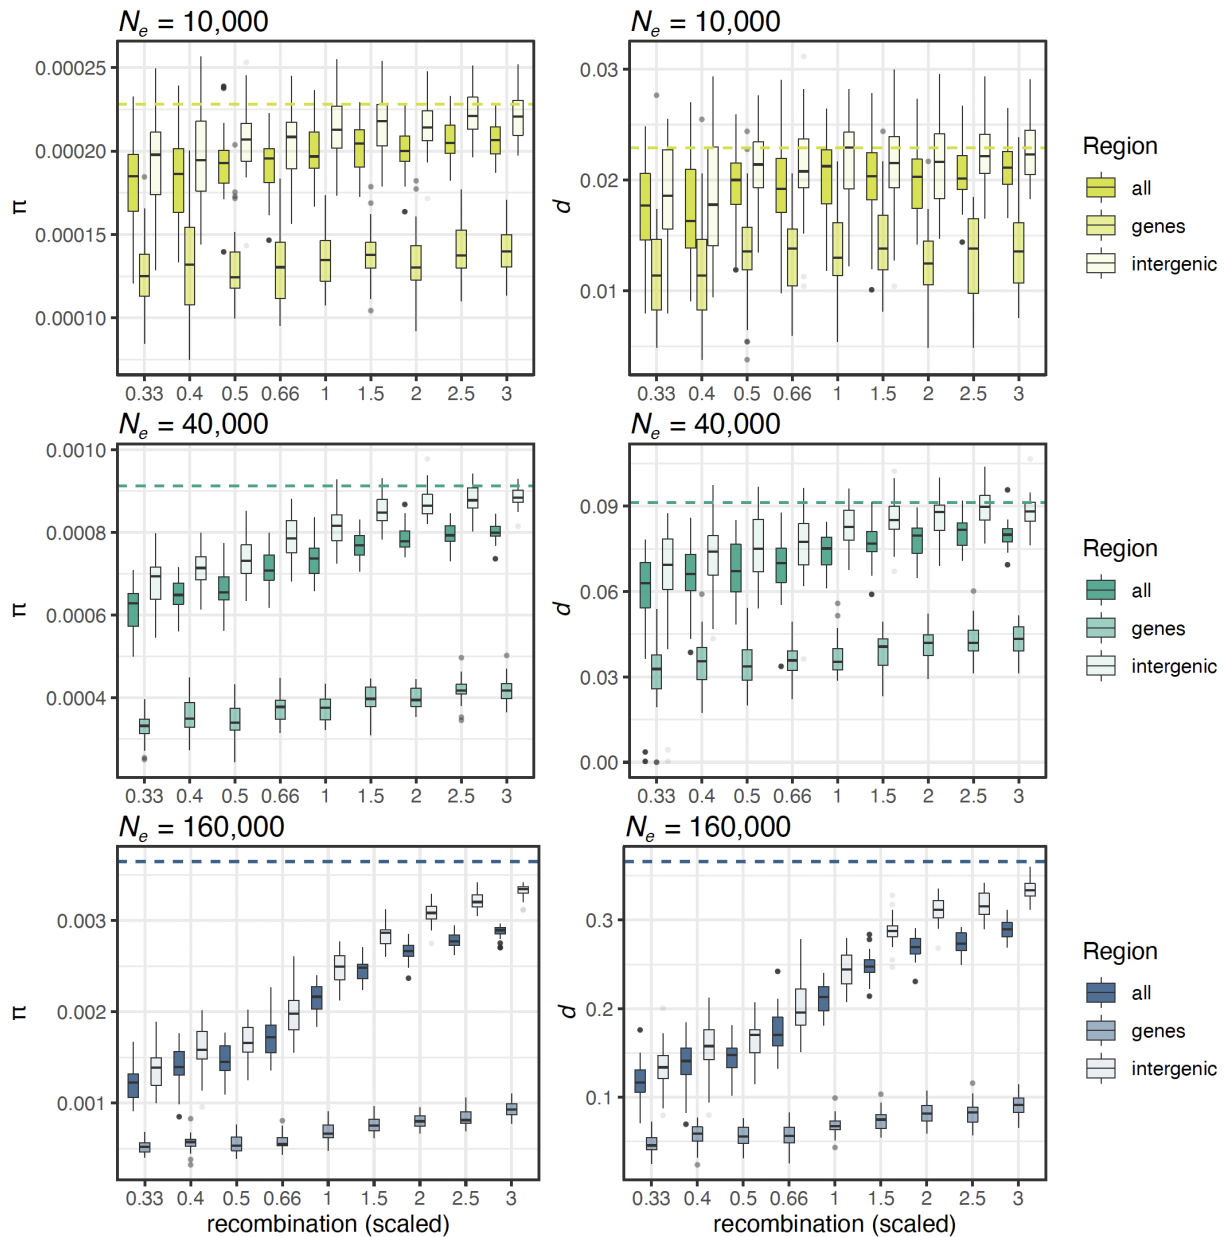

732  
733

734 **Fig. 3.** Boxplots summarizing results from evolutionary simulations on the relationship between  
735 recombination rate and  $d$  in models with selection and without gene conversion in each of three simulated  
736 ancestral  $N_e$  and three time points after the split from the ancestral pop<sub>A</sub> and a mild bottleneck. Gene  
737 conversion was not included in these models as no significant differences were found between models  
738 with and without gene conversion. (See Fig. S5 for comparisons with neutral models and models with a  
739 more severe bottleneck).

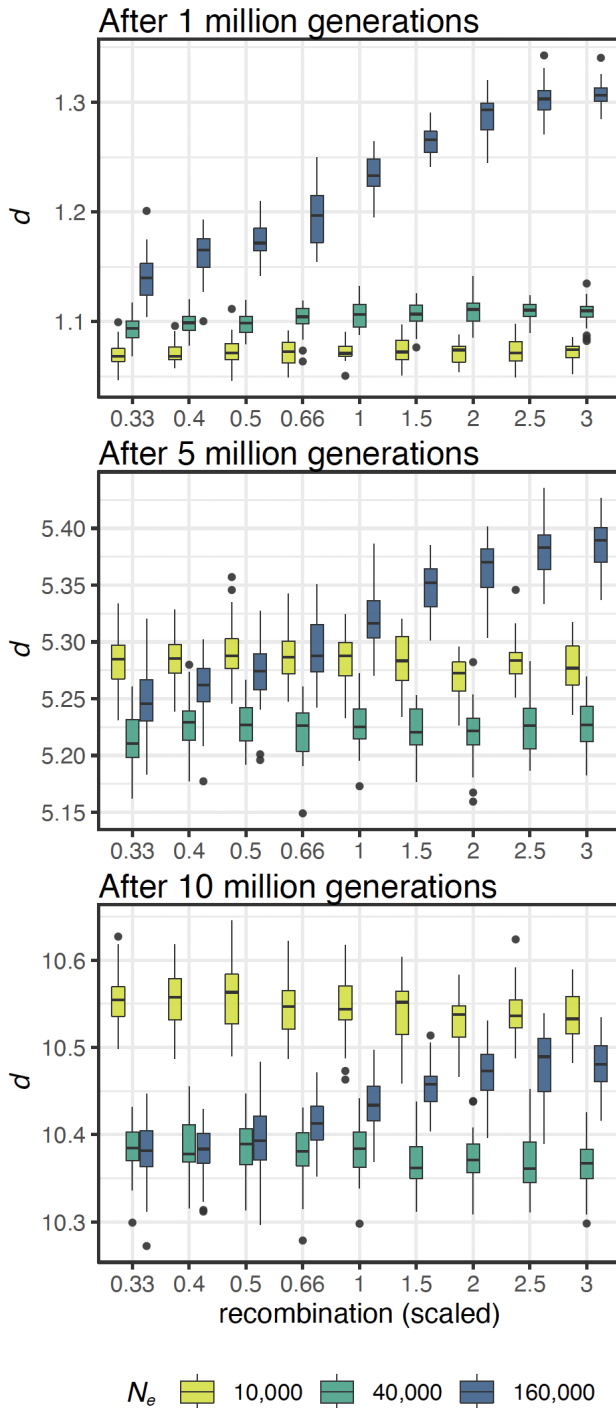

740  
741

742 **Fig. 4.** Plots showing the decay of  $\Delta d$  over time in the evolutionary simulations based on the models with  
743 and without gene conversion, and with a mild (0.5) and a severe bottleneck (0.1) for each of the three  
744 simulated ancestral  $N_e$ .

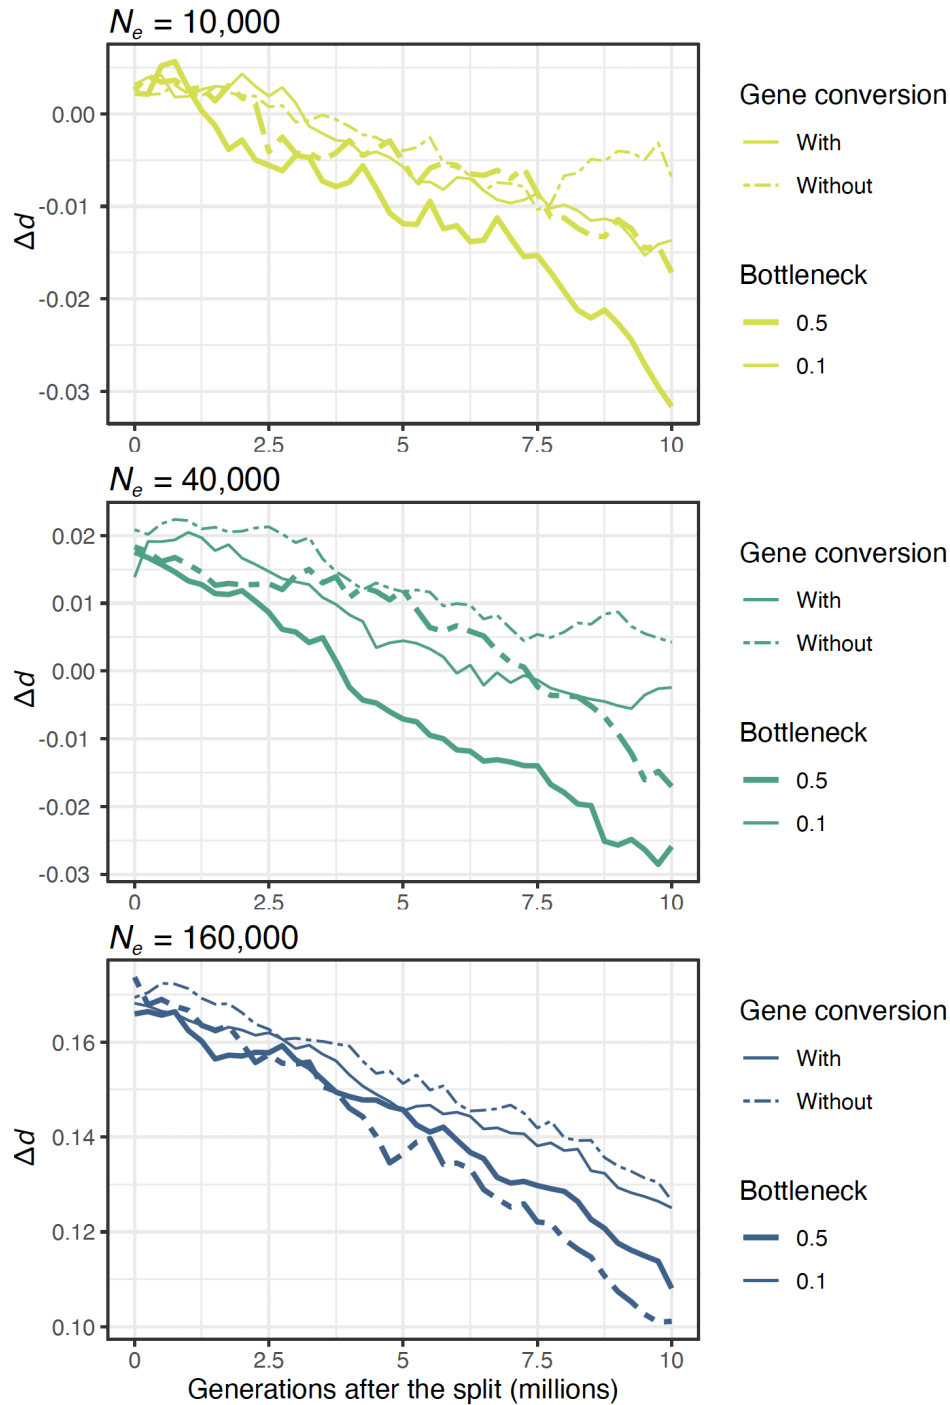

745  
746

747

748

749 **Table 1.** Summary of parameters used in evolutionary simulations.

| Variable                                                                                 | Values                                                                         | Scaled values as in simulations (x25)                                          |
|------------------------------------------------------------------------------------------|--------------------------------------------------------------------------------|--------------------------------------------------------------------------------|
| Mutation rate                                                                            | $5.7 \times 10^{-9}$                                                           | $1.42 \times 10^{-7}$                                                          |
| Mean recombination rate $r$                                                              | $10^{-8}$                                                                      | $2.5 \times 10^{-7}$                                                           |
| Gene conversion rate                                                                     | $r/3$                                                                          | $r/3$                                                                          |
| Gene conversion tract length                                                             | 440 bp                                                                         | 440 bp                                                                         |
| Selection coefficient $s$                                                                | $\pm 15.625 \times 10^{-3}$                                                    | $\pm 15.625 \times 10^{-3}$                                                    |
| Relative frequency of neutral, deleterious, and advantageous mutations                   | 0.3, 1, and 0.0005                                                             | 0.3, 1, and 0.0005                                                             |
| Selection model                                                                          | neutral/with selection                                                         | neutral/with selection                                                         |
| $N_e$ of pop <sub>A</sub>                                                                | 10,000/40,000/160,000                                                          | 400/1,600/6,400                                                                |
| Reduction of $N_e$ of pop <sub>1</sub> and pop <sub>2</sub> relative to pop <sub>A</sub> | 0.5/0.1                                                                        | 0.5/0.1                                                                        |
| Recombination rates                                                                      | 0.33 $r$ /0.4 $r$ /0.5 $r$ /0.66 $r$ / $r$ /1.5 $r$ /2 $r$ /2.<br>5 $r$ /3 $r$ | 0.33 $r$ /0.4 $r$ /0.5 $r$ /0.66 $r$ / $r$ /1.5 $r$ /2 $r$ /2.<br>5 $r$ /3 $r$ |
| Gene conversion                                                                          | yes/no                                                                         | yes/no                                                                         |

750
